# Supplementary material for: In Vitro and In Vivo Assessment of PEGylated PEI for Anti-IL-8/CxCL-1 siRNA Delivery to the Lungs
Source: Nanomaterials (Basel). 2020 Jun 27;10(7):1248. doi: 10.3390/nano10071248 (PMC7407419; doi:10.3390/nano10071248)
Supplement: Supplementary file 1 [file nanomaterials-10-01248-s001.pdf]

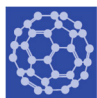

Article

# In Vitro and In Vivo Assessment of PEGylated PEI for Anti-IL-8/CxCL-1 siRNA Delivery to the Lungs

Alan J Hibbitts <sup>1,2</sup>, Joanne M Ramsey <sup>1</sup>, James Barlow <sup>3</sup>, Ronan MacLoughlin <sup>1,4,5</sup> and Sally-Ann Cryan <sup>1,2,\*</sup>

<sup>1</sup> School of Pharmacy & Biomolecular Sciences, Royal College of Surgeons in Ireland, Dublin, D02 YN77, Ireland; [alanhibbitts@rcsi.ie](mailto:alanhibbitts@rcsi.ie) (A.J.H.); [ramseyj@tcd.ie](mailto:ramseyj@tcd.ie) (J.M.R.); [RMacLoughlin@aerogen.com](mailto:RMacLoughlin@aerogen.com) (R.M.)

<sup>2</sup> Trinity Centre for Biomedical Engineering, Trinity College, Dublin, D02 R590, Ireland

<sup>3</sup> Dept of Chemistry, Royal College of Surgeons in Ireland, Dublin, D02 YN77, Ireland; [jambarlow@rcsi.ie](mailto:jambarlow@rcsi.ie)

<sup>4</sup> School of Pharmacy and Pharmaceutical Sciences, Trinity College, Dublin, D02PN40, Ireland

<sup>5</sup> Aerogen Ltd. Galway Business Park, Galway, H91 HE94, Ireland

\* Correspondence: [scryan@rcsi.ie](mailto:scryan@rcsi.ie); Tel.: +353-14022741

## Supplementary Materials:

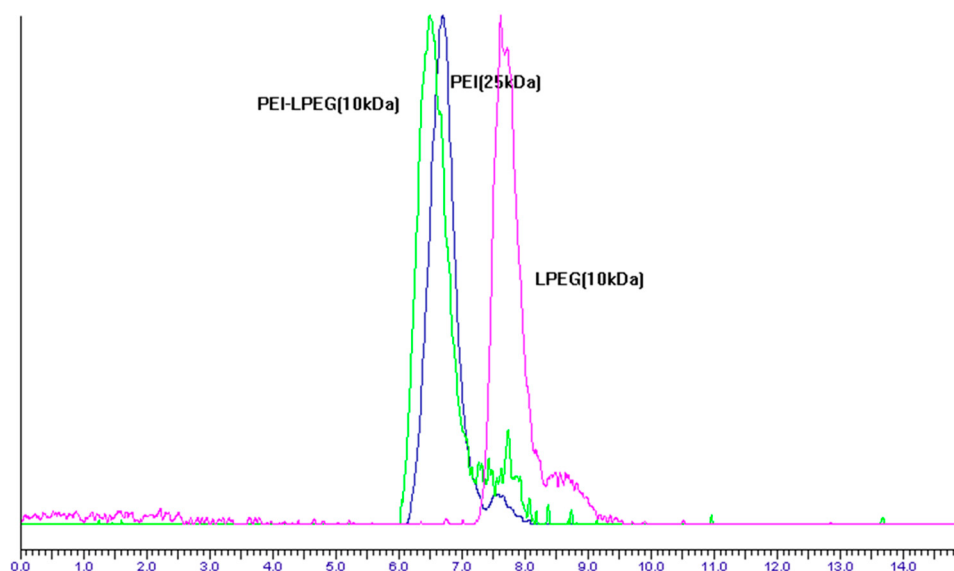

**Figure S1.** GPC size and purity analysis of synthesised PEI-LPEG overlaid with its respective starting materials.

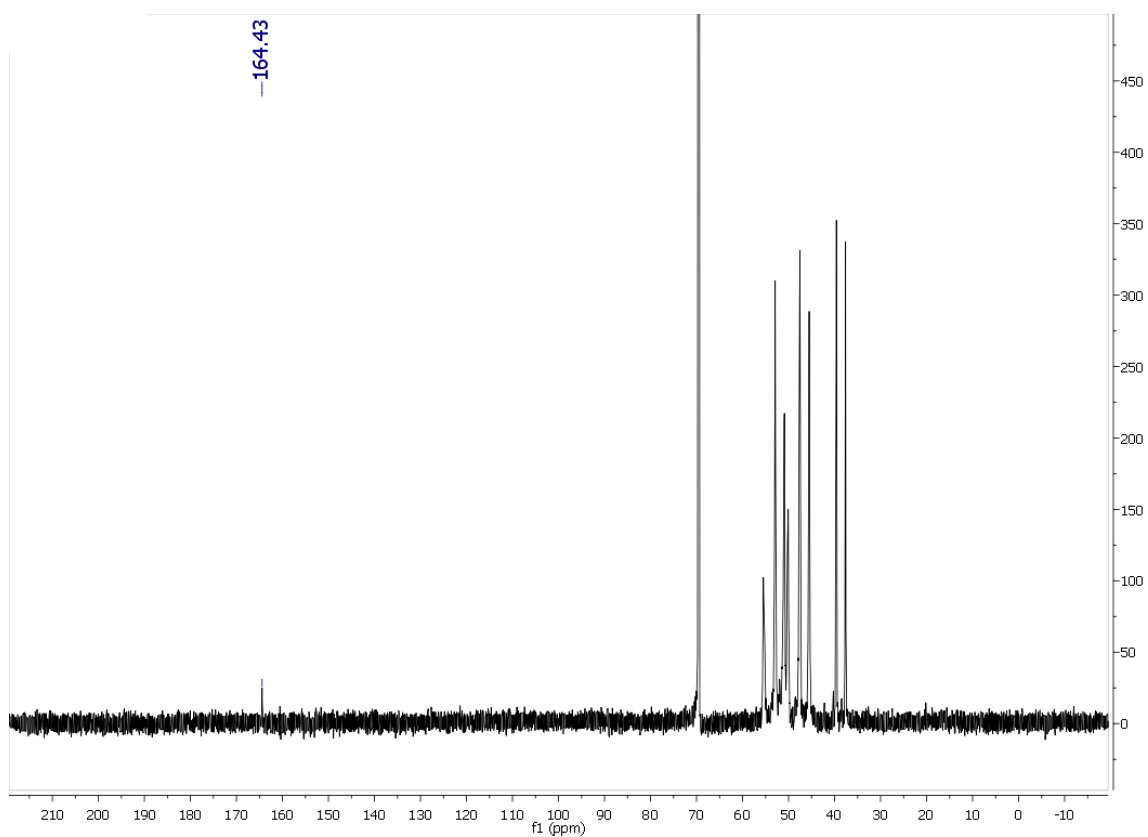

**Figure S2.** PEI-LPEG carboxylic bonding presence was shown in  $^{13}\text{C}$  NMR at 164 ppm.

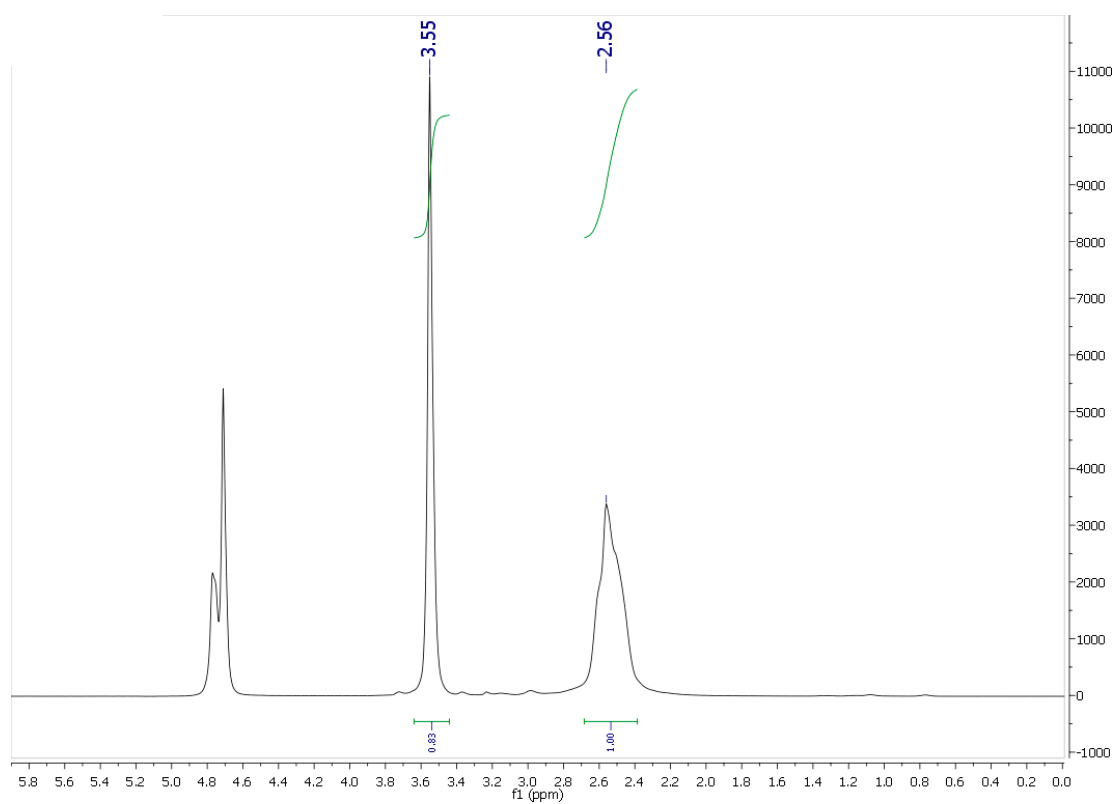

**Figure S3.**  $^1\text{H}$  NMR of synthesised PEI-LPEG polymer with PEI present at 2.5 ppm and PEG present at 3.5 ppm.

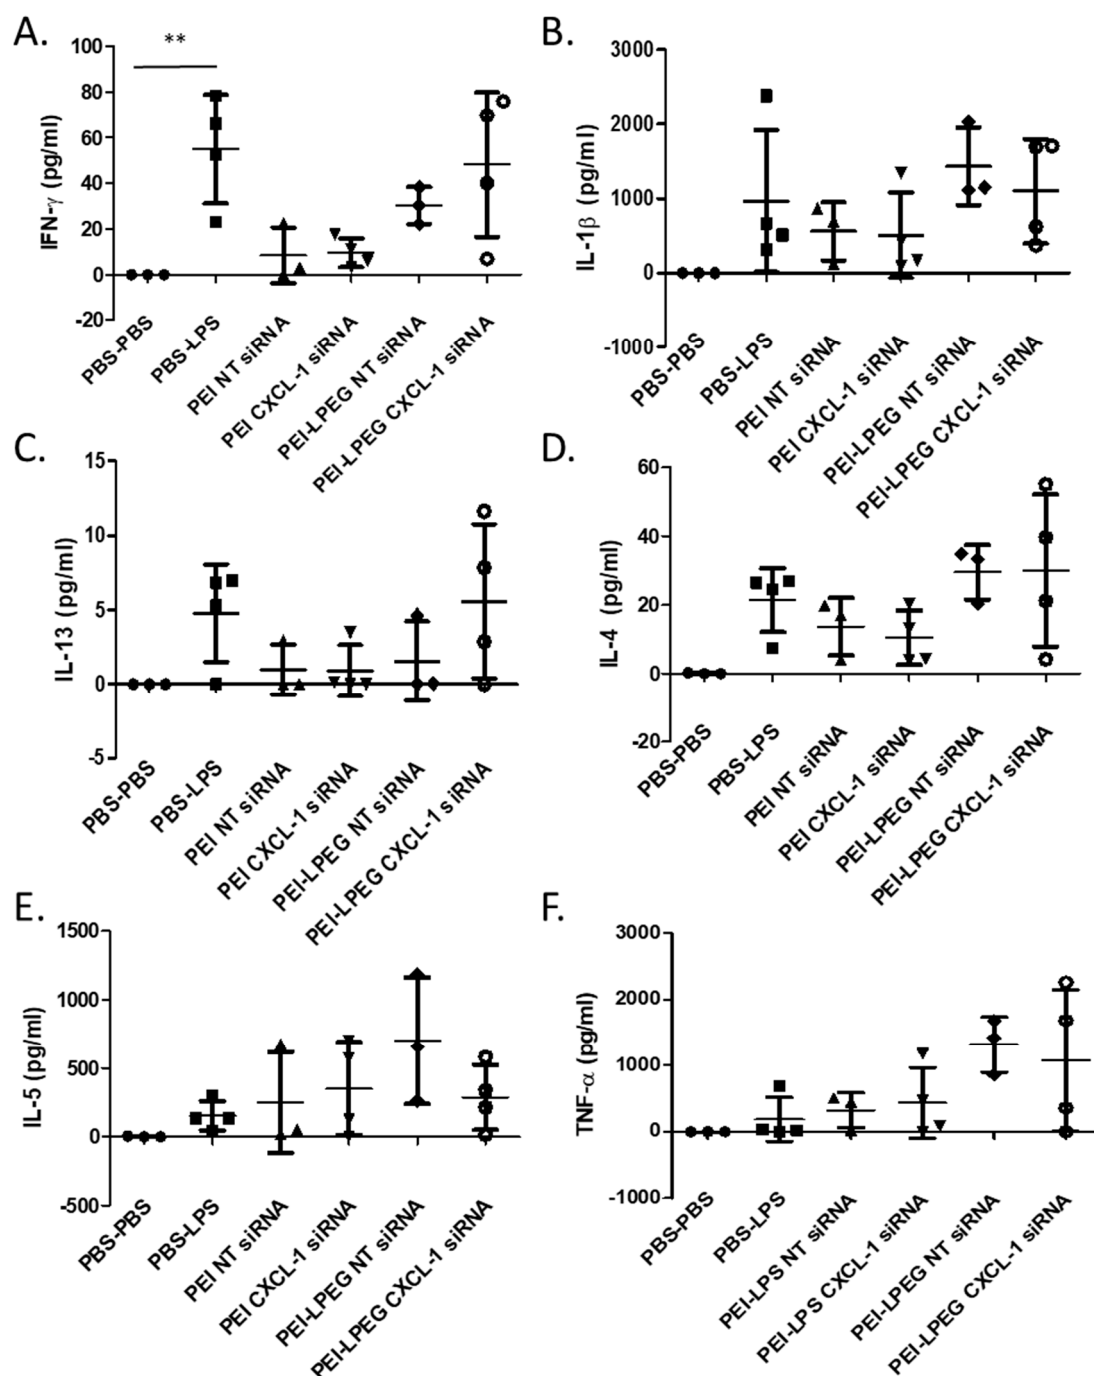

**Figure S4.** Rat Demonstration 7-Plex Ultra-Sensitive Kit analysis of inflammatory cytokine responses elicited by intratracheal instillation of PBS-PBS, PBS-LPS, non-targeting (NT) or anti-CXCL-1 siRNA nanoparticles in a rat model. (A) interferon- $\gamma$  (IFN- $\gamma$ ) (B) interleukin-1 $\beta$  (IL-1 $\beta$ ) (C) IL-13 (D) IL-4 (E) IL-5, and (F) tumour necrosis factor alpha (TNF- $\alpha$ ) (significance vs. PBS-LPS treated samples, Kruskal-Wallis test and Dunn's post-hoc test, min of  $n = 3 \pm SD$ , \*\*  $p < 0.01$ ).

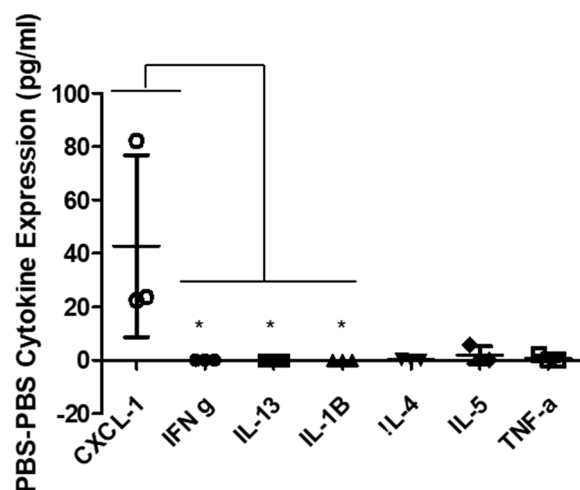

**Figure S5.** BAL cytokine expression levels in PBS-PBS treated rats (minimum  $n = 3 \pm \text{SD}$ , Kruskal-Wallis test and Dunn's post-hoc test, \*  $p < 0.05$ ).

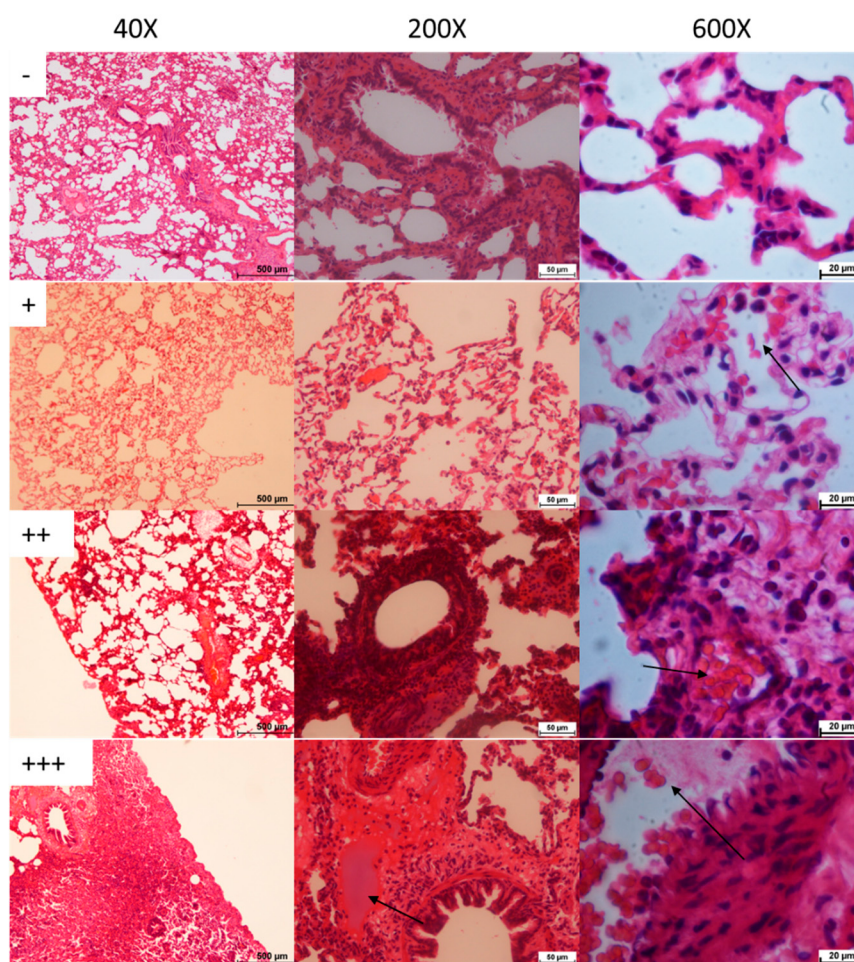

**Figure S6.** Pulmonary histopathology semi quantitative scoring of neutrophil-rich inflammation. Haematoxylin and eosin stained lung sections from top PBS, PBS-LPS and siRNA nanoparticle treated rats were scored based on the degree of neutrophil-rich inflammation observed (- absent, + mild, ++ moderate and +++ highly inflamed). Images were acquired at 40×, 200× and 600× magnification with

arrows indicating evidence of inflammation and of blood and protein in the alveoli and loss of the alveolar lining at higher levels of severity.

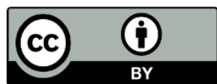

© 2020 by the authors. Submitted for possible open access publication under the terms and conditions of the Creative Commons Attribution (CC BY) license (<http://creativecommons.org/licenses/by/4.0/>).
